# Supplementary material
Source: PubMed Central journal article supplement (PMC7231734)
Supplement: mmc1.pdf [file mmc1.pdf]

## Supplemental Information

### Cross-reactive Antibody Response

### between SARS-CoV-2 and SARS-CoV Infections

Huibin Lv, Nicholas C. Wu, Owen Tak-Yin Tsang, Meng Yuan, Ranawaka A.P.M. Perera, Wai Shing Leung, Ray T.Y. So, Jacky Man Chun Chan, Garrick K. Yip, Thomas Shiu Hong Chik, Yiquan Wang, Chris Yau Chung Choi, Yihan Lin, Wilson W. Ng, Jincun Zhao, Leo L.M. Poon, J.S. Malik Peiris, Ian A. Wilson, and Chris K.P. Mok

**Table S1. Patient information, ELISA data, and neutralization data. Related to Figure 1.**

| ID                     | Gender | Age | day post-symptom onset | ELISA (OD <sub>450</sub> value at 1:100 dilution) |                |                |              | MN titer   |          |
|------------------------|--------|-----|------------------------|---------------------------------------------------|----------------|----------------|--------------|------------|----------|
|                        |        |     |                        | SARS-CoV-2 spike                                  | SARS-CoV spike | SARS-CoV-2 RBD | SARS-CoV RBD | SARS-CoV-2 | SARS-CoV |
| SARS-CoV-2 patient #1  | M      | 56  | 6                      | 0.30                                              | 0.21           | 0.03           | 0.01         | <1:10      | <1:10    |
| SARS-CoV-2 patient #2  | F      | 62  | 4                      | 0.32                                              | 0.23           | 0.07           | 0.03         | <1:10      | <1:10    |
| SARS-CoV-2 patient #3  | F      | 62  | 22                     | 1.97                                              | 0.66           | 1.46           | 0.12         | 1:160      | <1:10    |
| SARS-CoV-2 patient #4  | M      | 63  | 22                     | 1.95                                              | 0.98           | 1.56           | 0.58         | 1:80       | <1:10    |
| SARS-CoV-2 patient #5  | M      | 47  | 8                      | 0.52                                              | 0.40           | 0.20           | 0.03         | 1:80       | <1:10    |
| SARS-CoV-2 patient #6  | M      | 64  | 19                     | 1.81                                              | 0.54           | 1.40           | 0.50         | 1:320      | <1:10    |
| SARS-CoV-2 patient #7  | F      | 73  | 18                     | 1.60                                              | 0.71           | 0.90           | 0.17         | 1:80       | <1:10    |
| SARS-CoV-2 patient #8  | M      | 72  | 18                     | 1.94                                              | 1.19           | 1.21           | 0.14         | 1:80       | <1:10    |
| SARS-CoV-2 patient #9  | F      | 37  | 2                      | -0.25                                             | -0.10          | -0.05          | -0.39        | <1:10      | <1:10    |
| SARS-CoV-2 patient #10 | F      | 72  | 10                     | 1.44                                              | 0.41           | 1.04           | -0.03        | 1:40       | <1:10    |
| SARS-CoV-2 patient #11 | M      | 60  | 22                     | 2.53                                              | 1.38           | 2.24           | 1.15         | 1:160      | <1:10    |
| SARS-CoV-2 patient #12 | M      | 56  | 13                     | 1.57                                              | 0.64           | 1.37           | 0.00         | 1:320      | <1:10    |
| SARS-CoV-2 patient #13 | F      | 55  | 11                     | 0.03                                              | -0.09          | 0.05           | 0.08         | <1:10      | <1:10    |
| SARS-CoV-2 patient #14 | F      | 63  | 19                     | 2.44                                              | 1.12           | 2.06           | 1.42         | 1:640      | <1:10    |
| SARS-CoV-2 patient #15 | M      | 37  | 14                     | 1.85                                              | 1.60           | 1.43           | 0.59         | 1:320      | 1:10     |
| SARS-CoV patient #1    | NA     | NA  | NA                     | 0.41                                              | 0.53           | 0.28           | 0.55         | <1:10      | 1:80     |
| SARS-CoV patient #2    | NA     | NA  | NA                     | 0.80                                              | 0.20           | 0.30           | 1.28         | <1:10      | 1:40     |
| SARS-CoV patient #3    | NA     | NA  | NA                     | 0.27                                              | 0.22           | 0.12           | 0.76         | <1:10      | 1:80     |
| SARS-CoV patient #4    | NA     | NA  | NA                     | 0.07                                              | 0.04           | -0.03          | -0.08        | <1:10      | <1:10    |
| SARS-CoV patient #5    | NA     | NA  | NA                     | 0.13                                              | 0.11           | 0.04           | 0.17         | <1:10      | <1:10    |
| SARS-CoV patient #6    | NA     | NA  | NA                     | 0.43                                              | 0.16           | 0.25           | 1.36         | <1:10      | 1:160    |
| SARS-CoV patient #7    | NA     | NA  | NA                     | 0.77                                              | 0.47           | 0.63           | 2.34         | <1:10      | 1:320    |
| Healthy donor #1       | NA     | NA  | NA                     | 0.31                                              | 0.22           | 0.05           | 0.06         | ND         | ND       |
| Healthy donor #2       | NA     | NA  | NA                     | 0.11                                              | 0.20           | -0.15          | 0.00         | ND         | ND       |
| Healthy donor #3       | NA     | NA  | NA                     | 0.06                                              | 0.06           | 0.07           | 0.07         | ND         | ND       |
| Healthy donor #4       | NA     | NA  | NA                     | 0.07                                              | 0.07           | 0.05           | 0.06         | ND         | ND       |
| Healthy donor #5       | NA     | NA  | NA                     | 0.05                                              | 0.05           | 0.05           | 0.06         | ND         | ND       |
| Healthy donor #6       | NA     | NA  | NA                     | 0.05                                              | 0.05           | 0.04           | 0.07         | ND         | ND       |
| Healthy donor #7       | NA     | NA  | NA                     | 0.05                                              | 0.05           | 0.06           | 0.06         | ND         | ND       |
| Healthy donor #8       | NA     | NA  | NA                     | 0.05                                              | 0.05           | 0.06           | 0.07         | ND         | ND       |

NA = Not available/applicable

ND = Not determined

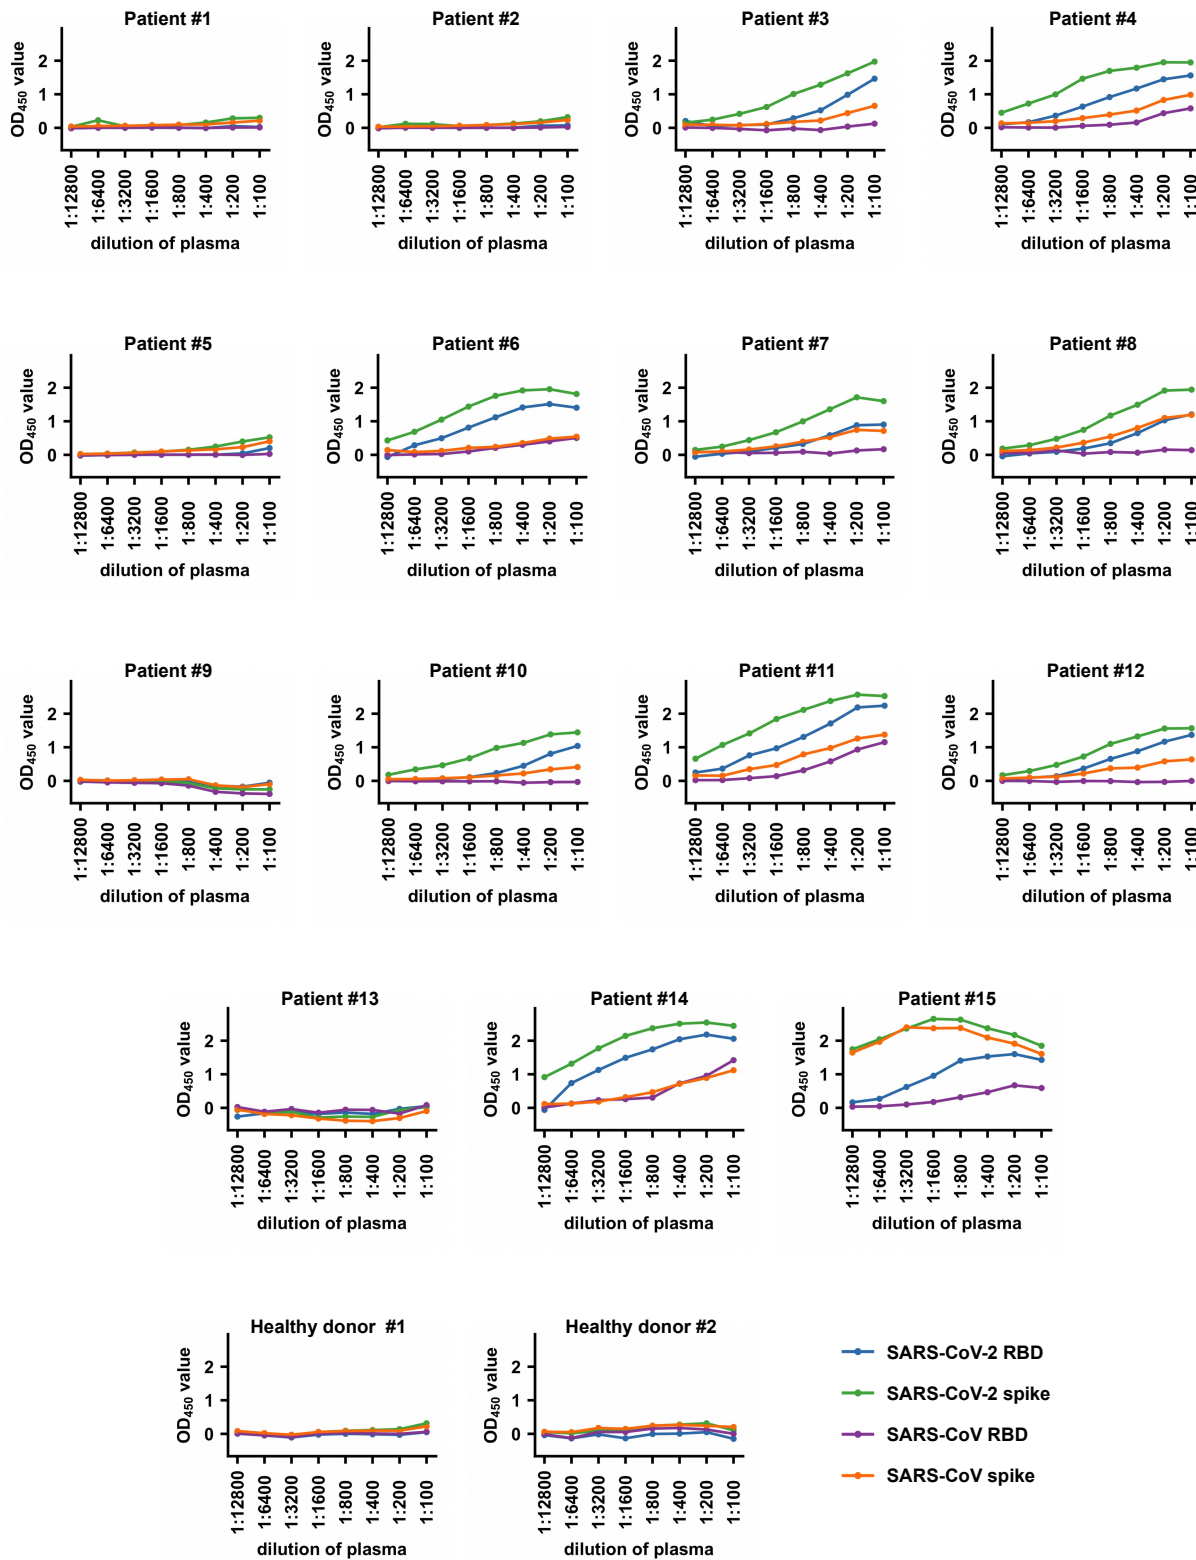

**Figure S1. ELISA of patient samples at different dilutions. Related to Figure 1.** Binding of different dilutions of plasma samples from 15 patients and 2 healthy donors to spike and RBD from SARS-CoV-2 and SARS-CoV was measured by ELISA. The mean OD<sub>450</sub> values calculated after testing each plasma sample in duplicate are shown.

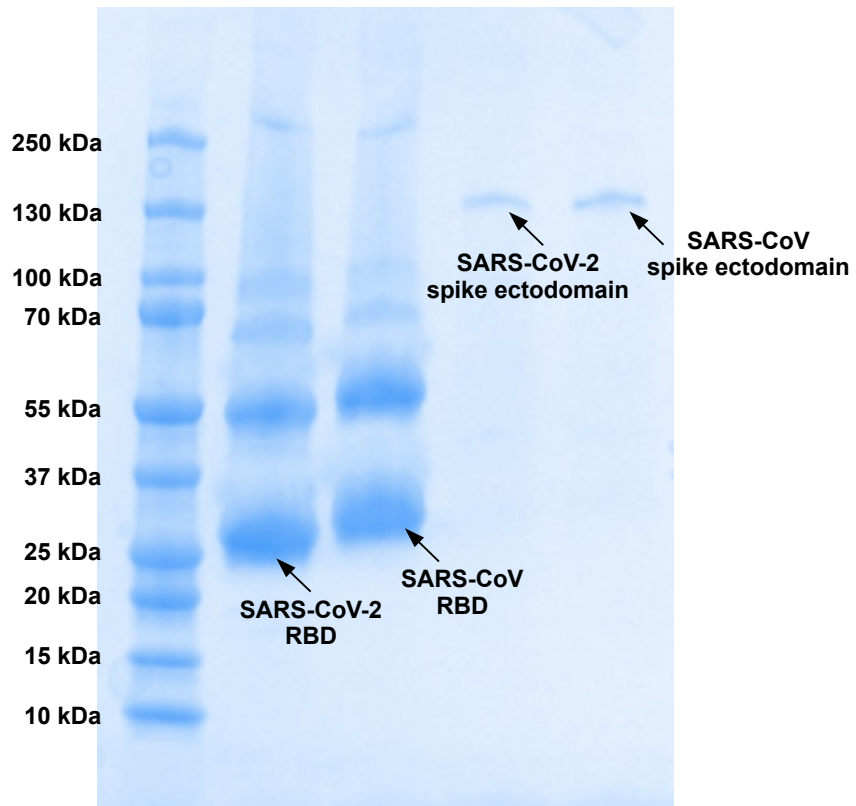

**Figure S2. Protein expression.** Related to Figure 1. SARS-CoV-2 and SARS-CoV ectodomain and RBD proteins were purified by Ni-NTA beads from insect cell expression supernatant and analyzed by Coomassie staining on an SDS-PAGE gel. The proteins were further purified by size exclusion chromatography before use.
